# Supplementary material
Source: PubMed Central journal article supplement (PMC4621061)
Supplement: JB.00420-15_zjb999093792so1.pdf [file JB.00420-15_zjb999093792so1.pdf]

1  
2  
3 **Supporting Information for:**  
4

5 **A cardiolipin-deficient mutant of *Rhodobacter sphaeroides* has an altered cell**  
6 **shape and is impaired in biofilm formation**  
7

8  
9 Ti-Yu Lin<sup>1</sup>, Thiago M. A. Santos<sup>1</sup>, Wayne S. Kontur<sup>2,3</sup>, Timothy J. Donohue<sup>2,3</sup>,  
10 Douglas B. Weibel<sup>1,4,5\*</sup>  
11

12  
13 <sup>1</sup> *Department of Biochemistry, University of Wisconsin–Madison, Madison, Wisconsin,*  
14 *USA*

15 <sup>2</sup> *Department of Bacteriology, University of Wisconsin–Madison, Madison, Wisconsin, USA*

16 <sup>3</sup> *DOE Great Lakes Bioenergy Research Center, Madison, Wisconsin, USA*

17 <sup>4</sup> *Department of Chemistry, University of Wisconsin–Madison, Madison, Wisconsin, USA*

18 <sup>5</sup> *Department of Biomedical Engineering, University of Wisconsin–Madison, Madison,*  
19 *Wisconsin, USA*  
20

21 \* Author to whom correspondence should be addressed:

22 Douglas B. Weibel

23 Department of Biochemistry

24 6424 Biochemical Sciences Building

25 440 Henry Mall

26 Phone: +1 (608) 890-1342

27 Fax: +1 (608) 265-0764

28 E-mail: weibel@biochem.wisc.edu  
29

30 *Running title:* Cardiolipin affects cell shape and biofilm formation  
31

32 *Keywords:* cardiolipin | *Rhodobacter sphaeroides* | cell shape | biofilms  
33  
34  
35  
36  
37  
38  
39  
40  
41  
42  
43  
44

45 **Results**

46 ***RSP\_0113* does not encode a cardiolipin synthase in *Rhodobacter sphaeroides***

47 To investigate the origins of the residual 10% of the cardiolipin (CL) in the CL3  
48 mutant, we performed a BLAST search and found another candidate *CL synthase (cls)*  
49 gene in *R. sphaeroides*: *RSP\_0113* (GenBank entry YP\_353188) (1, 2). *RSP\_0113* is 25%  
50 identical and 41% similar to the amino acid sequence of *Escherichia coli* CL synthase,  
51 and contains a phospholipase D domain that is a characteristic motif found in CL  
52 synthases. We cloned the *RSP\_0113* gene into an *E. coli* expression plasmid pTrc99A  
53 and an *R. sphaeroides* expression plasmid pIND4, and expressed it in the *E. coli*  
54 CL-deficient mutant BKT12 (3) and *R. sphaeroides* CL3, respectively. We were unable  
55 to detect CL in phospholipids extracted from BKT12 cells harboring a  
56 plasmid-encoded *RSP\_0113* gene or nor were we able to detect increased CL in  
57 analogous CL3 transformants (data not shown) by thin-layer chromatogram. These  
58 results suggest that *RSP\_0113* is not a CL synthase in either bacterium and leave us  
59 uncertain of the origins of the residual 10% CL in *R. sphaeroides* CL3.

60

61

62

63

64

65

66

67 **Materials and Methods**

68 **Confocal scanning laser microscopy of biofilms**

69 Stationary phase cell cultures were standardized to an absorbance of 1.0 ( $\lambda$ , 600 nm).

70 The standardized cultures were inoculated 1/100 in Sistrom's succinate medium

71 containing 5  $\mu\text{g}/\text{ml}$  Nile Red in a chamber slide with hydrophobic plastic surfaces

72 (ibidi, Verona, WI) and incubated for 72 h at 30°C. After washed with water to

73 remove planktonic cells, biofilms were imaged on a Nikon A1R- Si confocal

74 microscope. Images were processed with NIS-Elements AR software.

75

76

77

78

79

80

81

82

83

84

85

86

87

88

89 **References**

- 90 1. **Altschul SF, Madden TL, Schaffer AA, Zhang J, Zhang Z, Miller W, Lipman**  
91 **DJ.** 1997. Gapped BLAST and PSI-BLAST: a new generation of protein  
92 database search programs. *Nucleic Acids Res* **25**:3389-3402.
- 93 2. **Kontur WS, Schackwitz WS, Ivanova N, Martin J, Labutti K, Deshpande S,**  
94 **Tice HN, Pennacchio C, Sodergren E, Weinstock GM, Noguera DR,**  
95 **Donohue TJ.** 2012. Revised sequence and annotation of the *Rhodobacter*  
96 *sphaeroides* 2.4.1 genome. *J Bacteriol* **194**:7016-7017.
- 97 3. **Tan BK, Bogdanov M, Zhao J, Dowhan W, Raetz CR, Guan Z.** 2012.  
98 Discovery of a cardiolipin synthase utilizing phosphatidylethanolamine and  
99 phosphatidylglycerol as substrates. *Proc Natl Acad Sci U S A* **109**:16504-16509.

100

101

102

103

104

105

106

107

108

109

110

111 **Figures and Legends**

112 **Figure S1. Nile Red does not change cell shape and impede cell growth of *R.***

113 *sphaeroides*. (A) Images depicting the morphology of *R. sphaeroides* wild-type (WT)  
114 and CL3 cells grown aerobically in Sistrof's succinate medium containing 5 µg/mL  
115 Nile Red at 30°C with shaking at 200 rpm. Each data point was determined by  
116 imaging 300 cells using phase contrast brightfield microscopy and using ImageJ to  
117 determine cell width and length. The values represent mean values ± standard  
118 deviations. Differences of the cell shape parameters between the two strains were  
119 analyzed by Student's *t test*. The P value for all parameters measured was < 0.001.  
120 Scale bar, 2 µm. (B) Growth curves of *R. sphaeroides* WT and CL3 cells grown with  
121 shaking in glass test tubes at 30°C in Sistrof's succinate medium containing 5  
122 µg/mL Nile Red. The values represent mean values ± standard deviations obtained  
123 from three independent experiments. Although a ~0.1 difference in absorbance ( $\lambda$ ,  
124 600 nm) was observed at stationary phase, colony-forming units (CFUs) of the WT  
125 and CL3 strains were not significantly different (WT:  $1.6 \times 10^9$  CFU/mL, CL3:  $1.5 \times$   
126  $10^9$  CFU/mL).

127

128

129

130

131

132

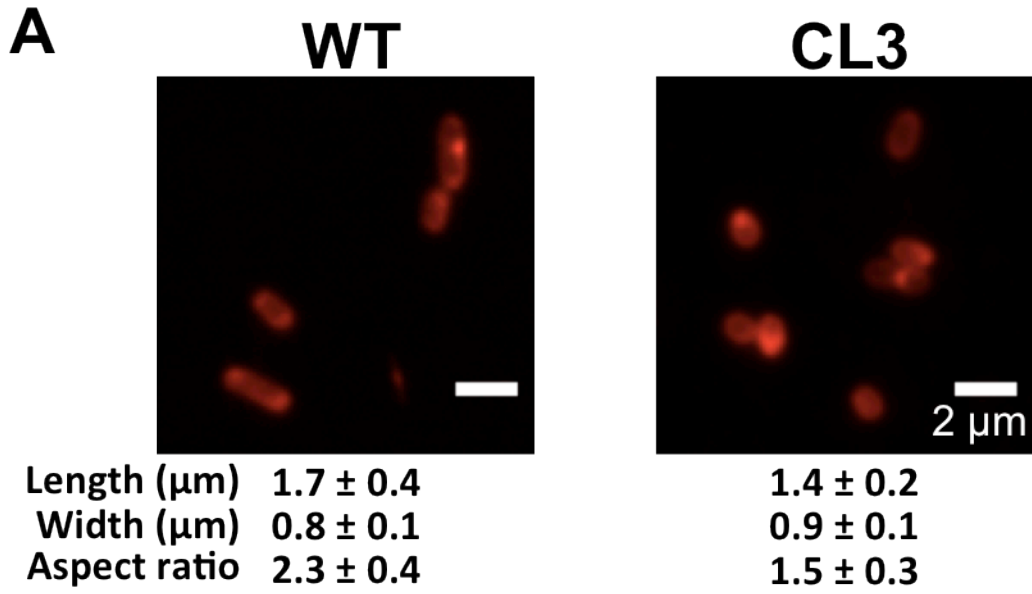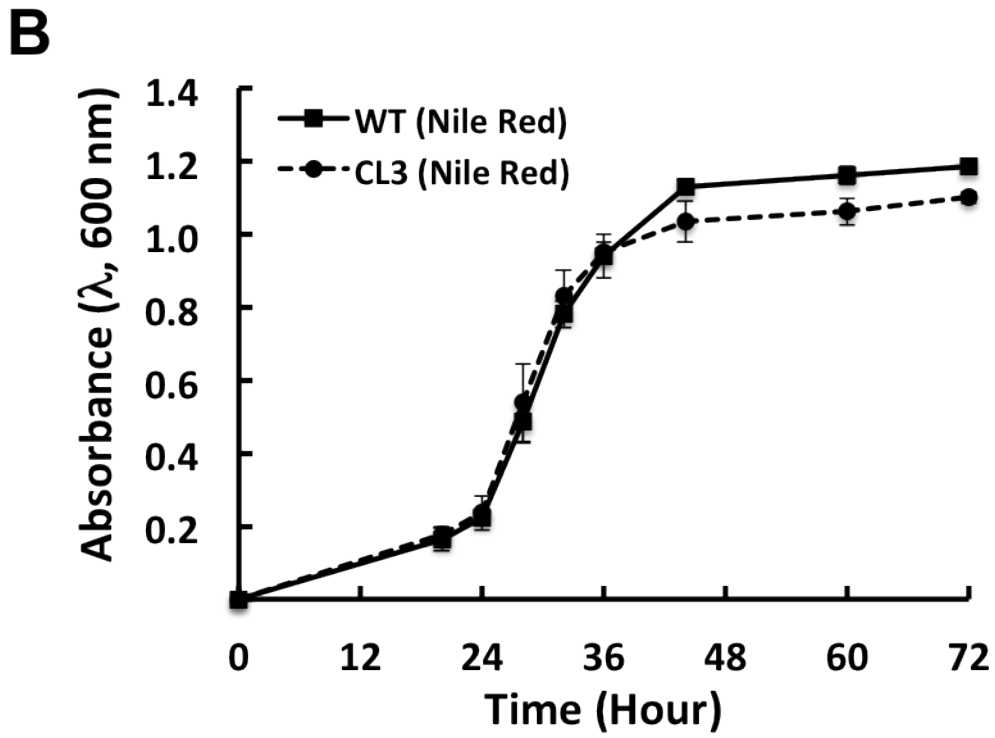

133

134 Figure S1

135

136

137

138

139 **Figure S2. Confocal laser scanning micrographs of *R. sphaeroides* WT and CL3**  
140 **biofilms.** *R. sphaeroides* WT and CL3 biofilms were grown on a chamber slide with  
141 hydrophobic plastic surfaces for 72 h at 30°C in Siström's succinate medium  
142 containing 5 µg/ml Nile Red and imaged using a confocal microscope. Upper panels:  
143 orthogonal views. Scale bar, 10 µm. Lower panels: 3-D reconstructions of confocal  
144 microscopy images. The thickness of *R. sphaeroides* WT biofilms was 20 µm. In  
145 contrast, the CL3 strain formed biofilms that were typically ~9-µm thick.

146

147

148

149

150

151

152

153

154

155

156

157

158

159

160

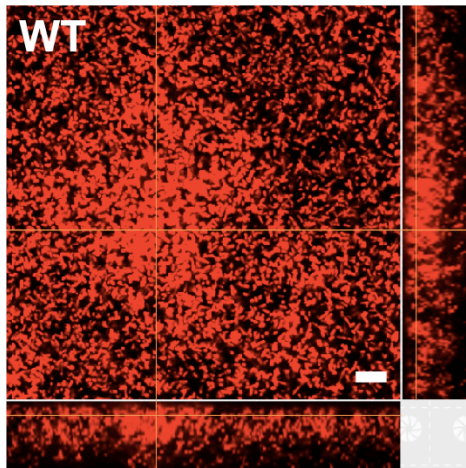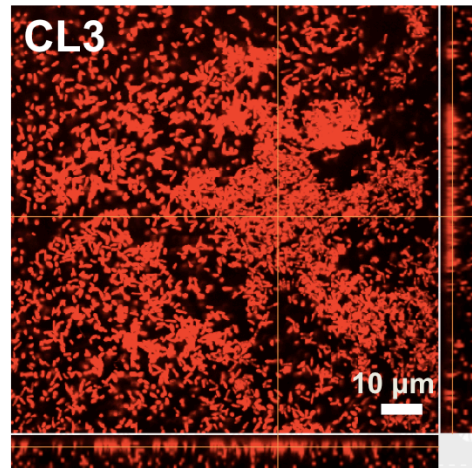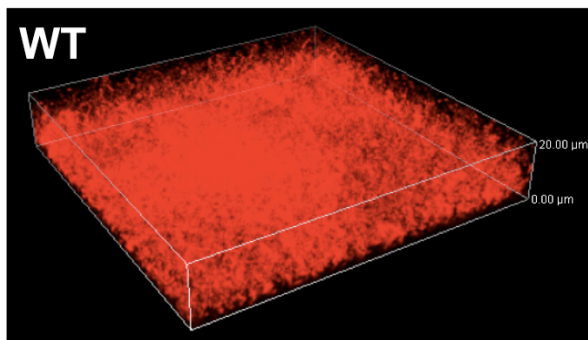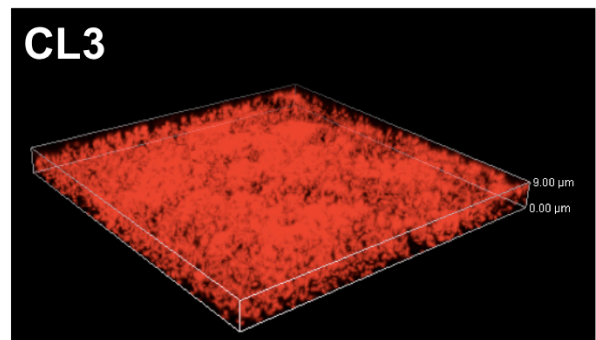

161

162 **Figure S2**

163

164

165

166

167

168

169

170

171

172

173



174 **Figure S3.** Representative micrographs of *R. sphaeroides* WT and CL3 cells attached  
175 to surfaces. *R. sphaeroides* WT and CL3 cells were grown on a chamber slide with  
176 hydrophobic plastic surfaces at 30°C in Siström's succinate medium. Cells attached  
177 to the surface were imaged at 1 h after inoculation. Images were acquired using  
178 phase contrast brightfield microscopy. Scale bar, 2 μm.

179

180

181

182

183

184

185

186

187

188

189

190

191

192

193

194

195

**WT**

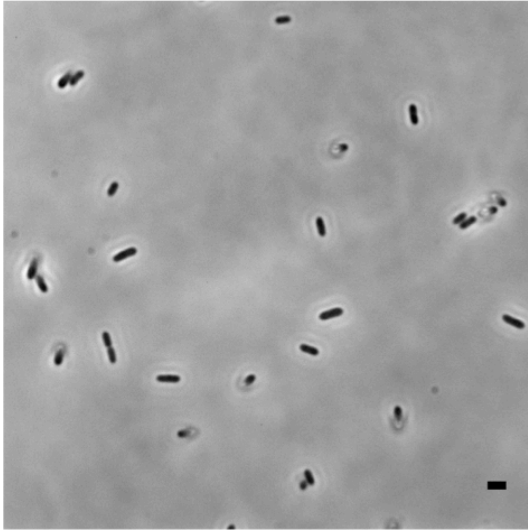

**CL3**

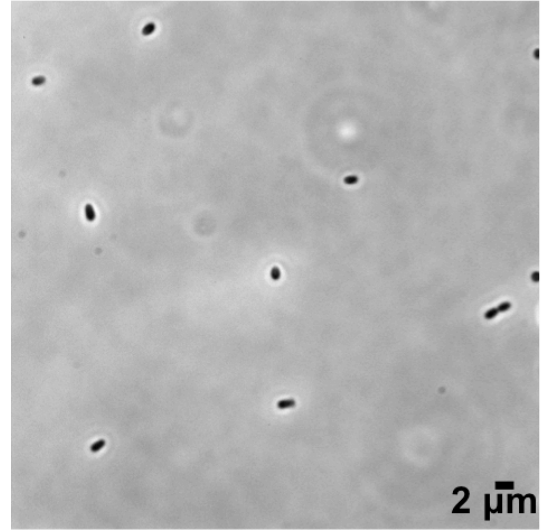

196

197 **Figure S3**

198

199

200

201

202

203

204

205

206

207

208

209

210

211

212 **Figure S4. Quantification of *R. sphaeroides* WT and CL3 biofilms grown in wells**  
213 **of a glass bottom microtiter plate.** Biofilms were grown on a glass bottom microtiter  
214 plate (MatTek, Ashland, MA) for 72 h at 30°C in Siström's succinate medium,  
215 followed by staining with crystal violet (CV). The extent of biofilm formation was  
216 determined by the absorbance of CV at  $\lambda$ , 550 nm. The values represent mean values  
217  $\pm$  standard deviations obtained from three independent experiments, each  
218 performed in 8 replicates. *R. sphaeroides* strain CL3 displayed a 50% reduction in  
219 biofilm formation compared with the WT strain after 72 h of incubation.

220

221

222

223

224

225

226

227

228

229

230

231

232

233

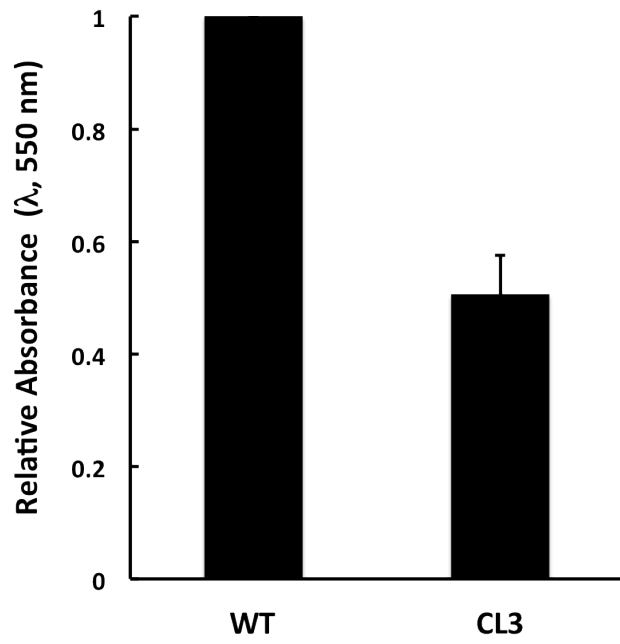

234

235 **Figure S4**

236

237

238

239

240

241

242

243

244

245

246

247

248

249 **Figure S5. Exopolysaccharides (EPS) extracted from planktonic cultures of *R.***  
250 ***sphaeroides* WT and CL3 cells.** Cells were grown with shaking in glass test tubes for  
251 72 h at 30°C in Siström's succinate medium. The EPS in growth media was  
252 precipitated by adding absolute ethanol to a final concentration of 75%, separated on  
253 an SDS-polyacrylamide gel using electrophoresis, and visualized by silver staining.  
254 EPS from both *R. sphaeroides* strains displayed similar banding patterns and was  
255 present in similar amounts.

256

257

258

259

260

261

262

263

264

265

266

267

268

269

270

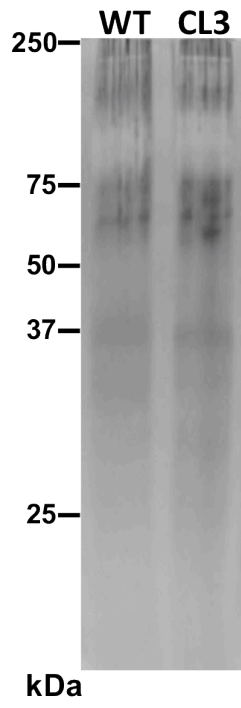

271

**kDa**

272 Figure S5
